# Supplementary material for: Determinants of life satisfaction among migrants in South Africa: an analysis of the GCRO’s quality of life survey (2009–2021)
Source: Springer Nature journal article supplement (doi:10.1186/s12889-023-16868-1), 2023-10-18
Supplement: MOESM3 [file 26196138]

```

clear
use "C:\gcro-qlf-2009-v1.1-20011209-stata12\gcro-qlf-2009-v1.1-20011209-s12.dta", clear
*numlabel, add
*rename ID Unique_Identifier
*Weights
*Persons weight
* Weight
*Household weight
* HH_WEIGHT

*In-migrants and Immigrants
ta Q1_9
ta Q1_11
generate Migration_Stat=.
replace Migration_Stat=1 if Q1_9==1 | Q1_9==2 | Q1_9==4 | Q1_9==5 | Q1_9==6 | Q1_9==7 |
Q1_9==8 | Q1_9==9
replace Migration_Stat=1 if Q1_11==1 | Q1_11==2 | Q1_11==4 | Q1_11==5 | Q1_11==6 | Q1_11==7
| Q1_11==8 | Q1_11==9
replace Migration_Stat=2 if Q1_9==10
replace Migration_Stat=2 if Q1_11==10
replace Migration_Stat=3 if Q1_9==3
replace Migration_Stat=3 if Q1_11==3
ta Migration_Stat
recode Migration_Stat (1=1 "In-migrants") (2=2 "Immigrants") (3=3 "Non_migrants"), gen
(Migration_Status)
replace Migration_Status=. if Migration_Status==3
ta Migration_Status [iw=Weight]

*Individual factors
ta Q12_2 [iw=Weight]
replace Q12_2=. if Q12_2==17
recode Q12_2 (18/27=1 "18-27") (28/37=2 "28-37") (38/47=3 "38-47") (48/92=4 "48+"), gen
(Grouped_Age)
ta Grouped_Age [iw=Weight]

```

```

ta A19 [iw=Weight]
ta Educ [iw=Weight]
recode Educ (1=1 "No_Edu") (2=2 "Primary") (3/4=3 "Secondary_Higher"), gen (Highest_Education)
ta Highest_Education [iw=Weight]
ta A18 [iw=Weight]
recode A18 (1=1 "Black_African") (2/4=2 "Non_Black_African"), gen (Population_group)
ta Population_group [iw=Weight]
ta Q12_12 [iw=Weight]
replace Q12_12=. if Q12_12==-1
replace Q12_12=. if Q12_12==13
recode Q12_12 (1=1 "No_income") (2/7=2 "Low") (8=3 "Middle") (9/12=4 "High"), gen (Income)
ta Income [iw=Weight]
ta Q7_1 [iw=Weight]
recode Q7_1 (1=2) (2=1)
*ta Empl
*Occupation
*ta Marrital_Status [iw=Weight]
*Access to media
*Parity/number of children
*IPV
ta Q10_3 [iw=Weight]
replace Q10_3=. if Q10_3==4
recode Q10_3 (3=1) (1/2=2)
ta Q10_1 [iw=Weight]
replace Q10_1=. if Q10_1>=4

*Household-level factors
*HH Wealth index
ta Q12_6 [iw=Weight]
ta Q12_5 [iw=Weight]
recode Q12_5 (1=1 "One") (2=2 "Two") (3=3 "Three") (4/26=4 "Four_More"), gen (People_in_HH)
ta People_in_HH [iw=Weight]
ta Q12_7 [iw=Weight]
recode Q12_7 (0=1) (1=2) (2=3) (3=4) (4/16=5)

```

\*ta HH member aged 60+ [iw=Weight]

ta Q4\_13 [iw=Weight], nol

recode Q4\_13 (2=1) (1=2) (0=3)

ta Q12\_13\_3 [iw=Weight]

recode Q12\_13\_3 (1=2) (2=1)

\*Community-level factors

gen Media=.

replace Media= 1 if Q4\_9\_1==2 & Q4\_9\_2==2 & Q4\_9\_4==2 & Q4\_9\_5==2 & Q4\_9\_6==2 & Q4\_9\_8==2

replace Media= 2 if Q4\_9\_1==1 & Q4\_9\_2==1 & Q4\_9\_4==1 & Q4\_9\_5==1 & Q4\_9\_6==1 & Q4\_9\_8==1

recode Media (1=1 "No") (2=2 "Yes"), gen (Media\_Access)

\*Residential status

ta A20 [iw=Weight]

recode A20 (1/6=1) (7/10=2), gen (Type\_Dwelling)

ta Type\_Dwelling [iw=Weight]

ta Migration\_Status [iw=Weight]

ta Media\_Access [iw=Weight]

ta Migration\_Status [iw=Weight]

\*Individual factors

ta Grouped\_Age [iw=Weight]

ta A19 [iw=Weight]

ta Highest\_Education [iw=Weight]

ta Population\_group [iw=Weight]

ta Income [iw=Weight]

ta Q7\_1 [iw=Weight]

\*ta Empl

\*Occupation

\*ta Marrital\_Status [iw=Weight]

\*Access to media

\*Parity/number of children

\*IPV

ta Q10\_3 [iw=Weight]

ta Q10\_1 [iw=Weight]

\*Household-level factors

\*HH Wealth index

ta Q12\_6 [iw=Weight]

ta People\_in\_HH [iw=Weight]

ta Q12\_7 [iw=Weight]

\*ta HH member aged 60+ [iw=Weight]

ta Q4\_13 [iw=Weight]

ta Q12\_13\_3 [iw=Weight]

\*Community-level factors

ta Media\_Access

\*Residential status

ta Type\_Dwelling [iw=Weight]

ta Migration\_Status [iw=Weight]

ta Media\_Access [iw=Weight]

\*\*\*\*\*

\*Individual factors

ta Migration\_Status

gen life\_sati\_5=Q6\_9 if Migration\_Status==1 | Migration\_Status==2

\*gen lifesatisfaction=LifeSati if Migration\_Status==1 | Migration\_Status==2

gen groupedage=Grouped\_Age if Migration\_Status==1 | Migration\_Status==2

gen sex=A19 if Migration\_Status==1 | Migration\_Status==2

gen highesteducation=Highest\_Education if Migration\_Status==1 | Migration\_Status==2

gen populationgroup=Population\_group if Migration\_Status==1 | Migration\_Status==2

gen income=Income if Migration\_Status==1 | Migration\_Status==2

gen working=Q7\_1 if Migration\_Status==1 | Migration\_Status==2

\*gen marritalstatus=Marrital\_Status if Migration\_Status==1 | Migration\_Status==2

gen medicalaid=Q10\_3 if Migration\_Status==1 | Migration\_Status==2

gen healthfacility=Q10\_1 if Migration\_Status==1 | Migration\_Status==2

\*Household-level factors

gen hhhead=Q12\_6 if Migration\_Status==1 | Migration\_Status==2

recode hhhead (1/9=1 "HhH"), gen (HHead)

ta HHead

gen HHeadSex=.

replace HHeadSex=1 if HHead==1 & sex==1

replace HHeadSex=2 if HHead==1 & sex==2

gen hhmembers=People\_in\_HH if Migration\_Status==1 | Migration\_Status==2

gen under18=Q12\_7 if Migration\_Status==1 | Migration\_Status==2

\*gen sixtyplus=q14\_7\_60plus\_recode if Migration\_Status==1 | Migration\_Status==2

gen childhunger=Q4\_13 if Migration\_Status==1 | Migration\_Status==2

gen social\_grant=Q12\_13\_3 if Migration\_Status==1 | Migration\_Status==2

\*Community-level factors

gen dwellingtype=Type\_Dwelling if Migration\_Status==1 | Migration\_Status==2

\*gen Migration\_Status if Migration\_Status==1 | Migration\_Status==2

gen mediaaccess=Media\_Access if Migration\_Status==1 | Migration\_Status==2

drop if Migration\_Status==.

\*drop if lifesatisfaction==.

drop if groupedage==.

drop if sex==.

drop if highesteducation==.

drop if populationgroup==.

drop if income==.

drop if working==.

\*drop if marritalstatus==.

drop if medicalaid==.

drop if healthfacility==.

drop if dwellingtype==.

\*Frequency

ta life\_sati\_5 Migration\_Status [iw=Weight]

ta Migration\_Status [iw=Weight]

\*ta lifesatisfaction

ta groupedage Migration\_Status [iw=Weight]

ta sex Migration\_Status [iw=Weight]

ta highesteducation Migration\_Status [iw=Weight]

ta populationgroup Migration\_Status [iw=Weight]

ta income Migration\_Status [iw=Weight]

ta working Migration\_Status [iw=Weight]

\*ta marritalstatus Migration\_Status [iw=Weight]

ta medicalaid Migration\_Status [iw=Weight]

ta healthfacility Migration\_Status [iw=Weight]

\*Household-level factors

ta HHeadSex Migration\_Status [iw=Weight]

ta hmembers Migration\_Status [iw=Weight]

ta under18 Migration\_Status [iw=Weight]

\*ta sixtyplus Migration\_Status [iw=Weight]

ta childhunger Migration\_Status [iw=Weight]

ta social\_grant Migration\_Status [iw=Weight]

\*Community-level factors

ta dwellingtype Migration\_Status [iw=Weight]

ta Migration\_Status Migration\_Status [iw=Weight]

ta mediaaccess Migration\_Status [iw=Weight]

\*Frequency by sex

ta Migration\_Status sex [iw=Weight]

ta life\_sati\_5 [iw=Weight]

ta life\_sati\_5 Migration\_Status [iw=Weight]

ta life\_sati\_5 sex [iw=Weight]

ta groupedage sex [iw=Weight]

ta sex [iw=Weight]  
ta highesteducation sex [iw=Weight]  
ta populationgroup sex [iw=Weight]  
ta income sex [iw=Weight]  
ta working sex [iw=Weight]  
\*ta marritalstatus sex [iw=Weight]  
ta medicalaid sex [iw=Weight]  
ta healthfacility sex [iw=Weight]

\*Household-level factors

ta HHeadSex [iw=Weight]  
ta hhmembers sex [iw=Weight]  
ta under18 sex [iw=Weight]  
\*ta sixtyplus sex [iw=Weight]  
ta childhunger sex [iw=Weight]  
ta social\_grant sex [iw=Weight]

\*Community-level factors

ta dwellingtype sex [iw=Weight]  
ta Migration\_Status sex [iw=Weight]  
ta mediaaccess sex [iw=Weight]

\*\*\*\*\*

table sex life\_sati\_5 Migration\_Status [iw=Weight]

table life\_sati\_5 Migration\_Status [iw=Weight]
