# Supplementary material for: Determinants of life satisfaction among migrants in South Africa: an analysis of the GCRO’s quality of life survey (2009–2021)
Source: Springer Nature journal article supplement (doi:10.1186/s12889-023-16868-1), 2023-10-18
Supplement: MOESM4 [file 26196138]

```

clear

use "C:\gcro-qls-2011-v1-stata12\Stata12\GCRO 2011_28Feb12noGIS.dta", clear

*numlabel, add

*rename recordid Unique_Identifier

*Weights

* WeightGCRO

*In-migrants and Immigrants

ta A_2_3

recode A_2_3 (1/8=1 "In-migrants") (9=2 "Immigrants"), gen (Migration_Status)

ta Migration_Status [iw=WeightGCRO]

*Individual factors

ta A_12_2 [iw=WeightGCRO]

recode A_12_2 (16/17=0 "Under18") (18/27=1 "18-27") (28/37=2 "28-37") (38/47=3 "38-47")
(48/99=4 "48+"), gen (Grouped_Age)

replace Grouped_Age=. if Grouped_Age==0

ta Grouped_Age [iw=WeightGCRO]

ta A2 [iw=WeightGCRO]

ta Education [iw=WeightGCRO]

recode Education (0=1 "No_Edu") (1=2 "Primary") (2/4=3 "Secondary_Higher"), gen
(Highest_Education)

ta Highest_Education [iw=WeightGCRO]

ta A1 [iw=WeightGCRO]

recode A1 (1=1 "Black_African") (2/4=2 "Non_Black_African"), gen (Population_group)

ta Population_group [iw=WeightGCRO]

ta A_12_7 [iw=WeightGCRO]

replace A_12_7=. if A_12_7==13

recode A_12_7 (1=1 "No_Income") (2/7=2 "Low") (8=3 "Middle") (9/12=4 "High"), gen (Income)

ta Income [iw=WeightGCRO]

recode A_8_21 (0=1) (1=2)

*ta EmploymentStatus [iw=WeightGCRO]

```

\*Occupation

\*ta q14\_4\_rel\_status [iw=WeightGCRO]

\*replace q14\_4\_rel\_status=. if q14\_4\_rel\_status==7

\*recode q14\_4\_rel\_status (3=1 "Never\_Married") (1=2 "Married\_Cohab") (2=2) (6=2) (4=3 "Divorced") (5=4 "Widowed"), gen (Marrital\_Status)

\*ta Marrital\_Status [iw=WeightGCRO]

\*Access to media

\*Parity/number of children

\*IPV

ta A\_11\_3 [iw=WeightGCRO]

replace A\_11\_3=. if A\_11\_3==4

recode A\_11\_3 (3=1) (1/2=2)

ta A\_11\_1 [iw=WeightGCRO]

replace A\_11\_1=. if A\_11\_1>=4

\*Household-level factors

\*HH Wealth index

ta A\_12\_5 [iw=WeightGCRO]

ta A\_12\_4 [iw=WeightGCRO]

recode A\_12\_4 (1=1 "One") (2=2 "Two") (3=3 "Three") (4/18=4 "Four\_More"), gen (People\_in\_HH)

ta People\_in\_HH [iw=WeightGCRO]

ta A\_12\_6 [iw=WeightGCRO]

recode A\_12\_6 (0=1) (1=2) (2=3) (3=4) (4/8=5)

\*ta q14\_7\_60plus\_recode [iw=WeightGCRO]

ta A\_5\_28 [iw=WeightGCRO]

recode A\_5\_28 (0=1) (1=2)

ta A\_12\_10 [iw=WeightGCRO]

recode A\_12\_10 (0=1) (1=2)

\*Community-level factors

gen Media=.

replace Media= 1 if A\_5\_17==0 & A\_5\_18==0 & A\_5\_19==0 & A\_5\_20==0 & A\_5\_21==0 & A\_5\_22==0 & A\_5\_23==0

replace Media= 2 if A\_5\_17==1 & A\_5\_18==1 & A\_5\_19==1 & A\_5\_20==1 & A\_5\_21==1 & A\_5\_22==1 & A\_5\_23==1

recode Media (1=1 "No") (2=2 "Yes"), gen (Media\_Access)

\*Residential status

ta DwellingType [iw=WeightGCRO]  
replace DwellingType=. if DwellingType==3  
ta Migration\_Status [iw=WeightGCRO]  
ta Media\_Access [iw=WeightGCRO]  
  
ta Migration\_Status [iw=WeightGCRO]

\*Individual factors

ta Grouped\_Age [iw=WeightGCRO]  
ta A2 [iw=WeightGCRO]  
ta Highest\_Education [iw=WeightGCRO]  
ta Population\_group [iw=WeightGCRO]  
ta Income [iw=WeightGCRO]  
ta A\_8\_21 [iw=WeightGCRO]  
ta A\_11\_3 [iw=WeightGCRO]  
ta A\_11\_1 [iw=WeightGCRO]

\*Household-level factors

\*HH Wealth index  
ta A\_12\_5 [iw=WeightGCRO]  
ta People\_in\_HH [iw=WeightGCRO]  
ta A\_12\_6 [iw=WeightGCRO]  
\*ta q14\_7\_60plus\_recode [iw=WeightGCRO]  
ta A\_5\_28 [iw=WeightGCRO]  
ta A\_12\_10 [iw=WeightGCRO]

\*Community-level factors

\*Residential status  
ta DwellingType [iw=WeightGCRO]  
ta Migration\_Status [iw=WeightGCRO]  
ta Media\_Access [iw=WeightGCRO]

\*\*\*\*\*

\*Individual factors

ta Migration\_Status

gen life\_sati\_5=A\_7\_10 if Migration\_Status==1 | Migration\_Status==2

\*gen lifesatisfaction=LifeSati if Migration\_Status==1 | Migration\_Status==2

gen groupedage=Grouped\_Age if Migration\_Status==1 | Migration\_Status==2

gen sex=A2 if Migration\_Status==1 | Migration\_Status==2

gen highesteducation=Highest\_Education if Migration\_Status==1 | Migration\_Status==2

gen populationgroup=Population\_group if Migration\_Status==1 | Migration\_Status==2

gen income=Income if Migration\_Status==1 | Migration\_Status==2

gen working=A\_8\_21 if Migration\_Status==1 | Migration\_Status==2

\*gen marritalstatus=Marrital\_Status if Migration\_Status==1 | Migration\_Status==2

gen medicalaid=A\_11\_3 if Migration\_Status==1 | Migration\_Status==2

gen healthfacility=A\_11\_1 if Migration\_Status==1 | Migration\_Status==2

\*Household-level factors

gen hhhead=A\_12\_5 if Migration\_Status==1 | Migration\_Status==2

recode hhhead (1/9=1 "HhH"), gen (HHead)

ta HHead

gen HHeadSex=.

replace HHeadSex=1 if HHead==1 & sex==1

replace HHeadSex=2 if HHead==1 & sex==2

gen hhmembers=People\_in\_HH if Migration\_Status==1 | Migration\_Status==2

gen under18=A\_12\_6 if Migration\_Status==1 | Migration\_Status==2

\*gen sixtyplus=q14\_7\_60plus\_recode if Migration\_Status==1 | Migration\_Status==2

gen childhunger=A\_5\_28 if Migration\_Status==1 | Migration\_Status==2

gen social\_grant=A\_12\_10 if Migration\_Status==1 | Migration\_Status==2

\*Community-level factors

gen dwellingtype=DwellingType if Migration\_Status==1 | Migration\_Status==2

\*gen Migration\_Status if Migration\_Status==1 | Migration\_Status==2

gen mediaaccess=Media\_Access if Migration\_Status==1 | Migration\_Status==2

drop if Migration\_Status==.

\*drop if lifesatisfaction==.

drop if groupedage==.

drop if sex==.

drop if highesteducation==.

drop if populationgroup==.

drop if income==.

drop if working==.

\*drop if marritalstatus==.

drop if medicalaid==.

drop if healthfacility==.

drop if dwellingtype==.

\*Frequency

ta life\_sati\_5 Migration\_Status [iw=WeightGCRO]

ta Migration\_Status [iw=WeightGCRO]

\*ta lifesatisfaction

ta groupedage Migration\_Status [iw=WeightGCRO]

ta sex Migration\_Status [iw=WeightGCRO]

ta highesteducation Migration\_Status [iw=WeightGCRO]

ta populationgroup Migration\_Status [iw=WeightGCRO]

ta income Migration\_Status [iw=WeightGCRO]

ta working Migration\_Status [iw=WeightGCRO]

\*ta marritalstatus Migration\_Status [iw=WeightGCRO]

ta medicalaid Migration\_Status [iw=WeightGCRO]

ta healthfacility Migration\_Status [iw=WeightGCRO]

\*Household-level factors

ta HHeadSex Migration\_Status [iw=WeightGCRO]

ta hhmembers Migration\_Status [iw=WeightGCRO]

ta under18 Migration\_Status [iw=WeightGCRO]

\*ta sixtyplus Migration\_Status [iw=WeightGCRO]

ta childhunger Migration\_Status [iw=WeightGCRO]

ta social\_grant Migration\_Status [iw=WeightGCRO]

\*Community-level factors

ta dwellingtype Migration\_Status [iw=WeightGCRO]

ta Migration\_Status Migration\_Status [iw=WeightGCRO]

ta mediaaccess Migration\_Status [iw=WeightGCRO]

\*Frequency by sex

ta Migration\_Status sex [iw=WeightGCRO]

ta life\_sati\_5 [iw=WeightGCRO]

ta life\_sati\_5 Migration\_Status [iw=WeightGCRO]

ta life\_sati\_5 sex [iw=WeightGCRO]

ta groupedage sex [iw=WeightGCRO]

ta sex [iw=WeightGCRO]

ta highesteducation sex [iw=WeightGCRO]

ta populationgroup sex [iw=WeightGCRO]

ta income sex [iw=WeightGCRO]

ta working sex [iw=WeightGCRO]

\*ta marritalstatus sex [iw=WeightGCRO]

ta medicalaid sex [iw=WeightGCRO]

ta healthfacility sex [iw=WeightGCRO]

\*Household-level factors

ta HHeadSex [iw=WeightGCRO]

ta hhmembers sex [iw=WeightGCRO]

ta under18 sex [iw=WeightGCRO]

\*ta sixtyplus sex [iw=WeightGCRO]

ta childhunger sex [iw=WeightGCRO]

ta social\_grant sex [iw=WeightGCRO]

\*Community-level factors

ta dwellingtype sex [iw=WeightGCRO]

ta Migration\_Status sex [iw=WeightGCRO]

ta mediaaccess sex [iw=WeightGCRO]

\*\*\*\*\*

table sex life\_sati\_5 Migration\_Status [iw=WeightGCRO]

table life\_sati\_5 Migration\_Status [iw=WeightGCRO]
