# Supplementary material for: Determinants of life satisfaction among migrants in South Africa: an analysis of the GCRO’s quality of life survey (2009–2021)
Source: Springer Nature journal article supplement (doi:10.1186/s12889-023-16868-1), 2023-10-18
Supplement: MOESM5 [file 26196138]

```

clear
use "C:\qols-iii-2013-2014-v1-stata\qol-iii-2013-2014-v1.dta", clear
numlabel, add
*rename ID Unique_Identifier
*Weights
* GCROweight

*In-migrants and Immigrants
ta X2_3
recode X2_3 (1=1 "In-migrants") (2=2 "Immigrants"), gen (Migration_Status)
ta Migration_Status [iw=GCROweight]

*Individual factors
ta X12_2 [iw=GCROweight]
recode X12_2 (14/17=0 "Under18") (18/27=1 "18-27") (28/37=2 "28-37") (38/47=3 "38-47")
(48/100=4 "48+"), gen (Grouped_Age)
replace Grouped_Age=. if Grouped_Age==0
ta Grouped_Age [iw=GCROweight]
ta H_2 [iw=GCROweight]
ta X12_1_RECODED [iw=GCROweight]
recode X12_1_RECODED (3=1 "No_Edu") (4=2 "Primary") (1/2=3 "Secondary_Higher") (5=3), gen
(Highest_Education)
ta Highest_Education [iw=GCROweight]
ta H_1 [iw=GCROweight]
replace H_1=. if H_1==5
recode H_1 (1=1 "Black_African") (2/4=2 "Non_Black_African"), gen (Population_group)
ta Population_group [iw=GCROweight]
ta X12_8 [iw=GCROweight]
replace X12_8=. if X12_8==18
recode X12_8 (17=1 "No_Income") (1/6=2 "Low") (7/8=3 "Middle") (9/16=4 "High"), gen (Income)

```

```

ta Income [iw=GCROweight]
recode X8_8 (0=1) (1=2)
*ta employment_status [iw=GCROweight]
**employment_status
*Occupation
*ta q14_4_rel_status [iw=GCROweight]
*replace q14_4_rel_status=. if q14_4_rel_status==7
*recode q14_4_rel_status (3=1 "Never_Married") (1=2 "Married_Cohab") (2=2) (6=2) (4=3
"Divorced") (5=4 "Widowed"), gen (Marrital_Status)
*ta Marrital_Status [iw=GCROweight]
*Access to media
*Parity/number of children
*IPV
ta X11_3 [iw=GCROweight]
replace X11_3=. if X11_3==4
recode X11_3 (3=1) (1/2=2)
ta X11_1 [iw=GCROweight]
replace X11_1=. if X11_1>=4

*Household-level factors
*HH Wealth index
ta X12_5 [iw=GCROweight]
ta X12_4_RECODED [iw=GCROweight]
recode X12_4_RECODED (1=1 "One") (2=2 "Two") (3=3 "Three") (4/7=4 "Four_More"), gen
(People_in_HH)
ta People_in_HH [iw=GCROweight]
ta X12_6 [iw=GCROweight]
recode X12_6 (0=1) (1=2) (2=3) (3=4) (4/18=5)
*ta q14_7_60plus_recode [iw=GCROweight]
ta X5_8 [iw=GCROweight]
recode X5_8 (0=1) (1=2) (2=3)
ta X12_11 [iw=GCROweight]
recode X12_11 (0=1) (1=2)

```

\*Community-level factors

gen Media=.

replace Media= 1 if X5\_4\_1==1 & X5\_4\_2==1 & X5\_4\_3==1 & X5\_4\_4==1 & X5\_4\_5==1 & X5\_4\_6==1 & X5\_4\_7==1 & X5\_6\_2==1 & X5\_6\_6==1

replace Media= 2 if X5\_4\_1==2 & X5\_4\_2==2 & X5\_4\_3==3 & X5\_4\_4==4 & X5\_4\_5==5 & X5\_4\_6==6 & X5\_4\_7==7 & X5\_6\_2==2 & X5\_6\_6==6

\*Q5\_1 X5\_6\_2 X5\_6\_6

recode Media (1=1 "No") (2=2 "Yes"), gen (Media\_Access)

\*Residential status

ta H\_3\_RECODED [iw=GCROweight]

replace H\_3\_RECODED=. if H\_3\_RECODED==3

ta Migration\_Status [iw=GCROweight]

ta Media\_Access [iw=GCROweight]

ta Migration\_Status [iw=GCROweight]

\*Individual factors

ta Grouped\_Age [iw=GCROweight]

ta H\_2 [iw=GCROweight]

ta Highest\_Education [iw=GCROweight]

ta Population\_group [iw=GCROweight]

ta Income [iw=GCROweight]

ta X8\_8 [iw=GCROweight]

ta X11\_3 [iw=GCROweight]

ta X11\_1 [iw=GCROweight]

\*Household-level factors

\*HH Wealth index

ta X12\_5 [iw=GCROweight]

ta People\_in\_HH [iw=GCROweight]

ta X12\_6 [iw=GCROweight]

ta X5\_8 [iw=GCROweight]

ta X12\_11 [iw=GCROweight]

\*Community-level factors

\*Residential status

ta H\_3\_RECODED [iw=GCROweight]

ta Migration\_Status [iw=GCROweight]

ta Media\_Access [iw=GCROweight]

\*\*\*\*\*

\*Individual factors

ta Migration\_Status

gen life\_sati\_5=X7\_10 if Migration\_Status==1 | Migration\_Status==2

\*gen lifesatisfaction=LifeSati if Migration\_Status==1 | Migration\_Status==2

gen groupedage=Grouped\_Age if Migration\_Status==1 | Migration\_Status==2

gen sex=H\_2 if Migration\_Status==1 | Migration\_Status==2

gen highesteducation=Highest\_Education if Migration\_Status==1 | Migration\_Status==2

gen populationgroup=Population\_group if Migration\_Status==1 | Migration\_Status==2

gen income=Income if Migration\_Status==1 | Migration\_Status==2

gen working=X8\_8 if Migration\_Status==1 | Migration\_Status==2

\*gen maritalstatus=Marrital\_Status if Migration\_Status==1 | Migration\_Status==2

gen medicalaid=X11\_3 if Migration\_Status==1 | Migration\_Status==2

gen healthfacility=X11\_1 if Migration\_Status==1 | Migration\_Status==2

\*Household-level factors

gen hhhead=X12\_5 if Migration\_Status==1 | Migration\_Status==2

recode hhhead (1/9=1 "HhH"), gen (HHead)

ta HHead

gen HHeadSex=.

replace HHeadSex=1 if HHead==1 & sex==1

replace HHeadSex=2 if HHead==1 & sex==2

gen hhmembers=People\_in\_HH if Migration\_Status==1 | Migration\_Status==2

gen under18=X12\_6 if Migration\_Status==1 | Migration\_Status==2

\*gen sixtyplus=q14\_7\_60plus\_recode if Migration\_Status==1 | Migration\_Status==2

gen childhunger=X5\_8 if Migration\_Status==1 | Migration\_Status==2

gen social\_grant=X12\_11 if Migration\_Status==1 | Migration\_Status==2

\*Community-level factors

gen dwellingtype=H\_3\_RECODED if Migration\_Status==1 | Migration\_Status==2

\*gen Migration\_Status if Migration\_Status==1 | Migration\_Status==2

gen mediaaccess=Media\_Access if Migration\_Status==1 | Migration\_Status==2

drop if Migration\_Status==.

\*drop if lifiesatisfaction==.

drop if groupedage==.

drop if sex==.

drop if highesteducation==.

drop if populationgroup==.

drop if income==.

drop if working==.

\*drop if marritalstatus==.

drop if medicalaid==.

drop if healthfacility==.

drop if dwellingtype==.

\*Frequency

ta life\_sati\_5 Migration\_Status [iw=GCROweight]

ta Migration\_Status [iw=GCROweight]

\*ta lifiesatisfaction

ta groupedage Migration\_Status [iw=GCROweight]

ta sex Migration\_Status [iw=GCROweight]

ta highesteducation Migration\_Status [iw=GCROweight]

ta populationgroup Migration\_Status [iw=GCROweight]

ta income Migration\_Status [iw=GCROweight]

ta working Migration\_Status [iw=GCROweight]

\*ta marritalstatus Migration\_Status [iw=GCROweight]

ta medicalaid Migration\_Status [iw=GCROweight]

ta healthfacility Migration\_Status [iw=GCROweight]

\*Household-level factors

ta HHeadSex Migration\_Status [iw=GCROweight]

ta hhmembers Migration\_Status [iw=GCROweight]

ta under18 Migration\_Status [iw=GCROweight]

\*ta sixtyplus Migration\_Status [iw=GCROweight]

ta childhunger Migration\_Status [iw=GCROweight]

ta social\_grant Migration\_Status [iw=GCROweight]

\*Community-level factors

ta dwellingtype Migration\_Status [iw=GCROweight]

ta Migration\_Status Migration\_Status [iw=GCROweight]

ta mediaaccess Migration\_Status [iw=GCROweight]

\*Frequency by sex

ta Migration\_Status sex [iw=GCROweight]

ta life\_sati\_5 [iw=GCROweight]

ta life\_sati\_5 Migration\_Status [iw=GCROweight]

ta life\_sati\_5 sex [iw=GCROweight]

ta groupedage sex [iw=GCROweight]

ta sex [iw=GCROweight]

ta highesteducation sex [iw=GCROweight]

ta populationgroup sex [iw=GCROweight]

ta income sex [iw=GCROweight]

ta working sex [iw=GCROweight]

\*ta marritalstatus sex [iw=GCROweight]

ta medicalaid sex [iw=GCROweight]

ta healthfacility sex [iw=GCROweight]

\*Household-level factors

ta HHeadSex [iw=GCROweight]

ta hhmembers sex [iw=GCROweight]

ta under18 sex [iw=GCROweight]

\*ta sixtyplus sex [iw=GCROweight]  
ta childhunger sex [iw=GCROweight]  
ta social\_grant sex [iw=GCROweight]

\*Community-level factors

ta dwellingtype sex [iw=GCROweight]  
ta Migration\_Status sex [iw=GCROweight]  
ta mediaaccess sex [iw=GCROweight]

\*\*\*\*\*

table sex life\_sati\_5 Migration\_Status [iw=GCROweight]  
table life\_sati\_5 Migration\_Status [iw=GCROweight]
