# Supplementary material for: Determinants of life satisfaction among migrants in South Africa: an analysis of the GCRO’s quality of life survey (2009–2021)
Source: Springer Nature journal article supplement (doi:10.1186/s12889-023-16868-1), 2023-10-18
Supplement: MOESM6 [file 26196138]

```

clear
use "C:\qol-iv-2015-2016-v1-stata\qol-iv-2015-2016-v1-stata\qol-iv-2014-2015-v1.dta", clear
numlabel, add
*rename ID Unique_Identifier

*Weights
*Bench_wgt_30002

*In-migrants and Immigrants
ta Q2_1
replace Q2_1=. if Q2_1==1
recode Q2_1 (2=1 "In-migrants") (3=2 "Immigrants"), gen (Migration_Status)
ta Migration_Status [iw=Bench_wgt_30002]

*Individual factors
ta Q12_3 [iw=Bench_wgt_30002]
recode Q12_3 (18/27=1 "18-27") (28/37=2 "28-37") (38/47=3 "38-47") (48/100=4 "48+"), gen
(Grouped_Age)
ta Grouped_Age [iw=Bench_wgt_30002]
ta S8 [iw=Bench_wgt_30002]
ta Q12_1_Recode [iw=Bench_wgt_30002]
replace Q12_1_Recode=. if Q12_1_Recode==6
recode Q12_1_Recode (1=1 "No_Edu") (2=2 "Primary") (3/5=3 "Secondary_Higher"), gen
(Highest_Education)
ta Highest_Education [iw=Bench_wgt_30002]
ta S7 [iw=Bench_wgt_30002]
replace S7=. if S7==5
recode S7 (1=1 "Black_African") (2/4=2 "Non_Black_African"), gen (Population_group)
ta Population_group [iw=Bench_wgt_30002]
ta Q12_10 [iw=Bench_wgt_30002]
replace Q12_10=. if Q12_10==19
recode Q12_10 (17=1 "No_Income") (1/6=2 "Low") (7/8=3 "Middle") (9/16=4 "High"), gen (Income)

```

```

ta Income [iw=Bench_wgt_30002]
recode Q8_15 (0=1) (1=2)
ta Q8_15 [iw=Bench_wgt_30002]
**Employment_Status
*Occupation
*ta q14_4_rel_status [iw=Bench_wgt_30002]
*replace q14_4_rel_status=. if q14_4_rel_status==7
*recode q14_4_rel_status (3=1 "Never_Married") (1=2 "Married_Cohab") (2=2) (6=2) (4=3
"Divorced") (5=4 "Widowed"), gen (Marrital_Status)
*ta Marrital_Status [iw=Bench_wgt_30002]
*Access to media
*Parity/number of children
*IPV
ta Q11_6 [iw=Bench_wgt_30002]
replace Q11_6=. if Q11_6>=5
recode Q11_6 (4=1) (2/3=2)
ta Q11_1 [iw=Bench_wgt_30002]
replace Q11_1=. if Q11_1>=4

*Household-level factors
*HH Wealth index
ta Q12_6 [iw=Bench_wgt_30002]
ta Q12_5_Recode [iw=Bench_wgt_30002]
recode Q12_5_Recode (1=1 "One") (2=2 "Two") (3=3 "Three") (4/7=4 "Four_More"), gen
(People_in_HH)
ta People_in_HH [iw=Bench_wgt_30002]
ta Q12_7_Recode [iw=Bench_wgt_30002]
recode Q12_7_Recode (1=1) (2=2) (3=3) (4/11=4)
*ta q14_7_60plus_recode [iw=Bench_wgt_30002]
ta Q5_9 [iw=Bench_wgt_30002]
recode Q5_9 (1=1) (2/5=2) (6=3)
ta Q12_8 [iw=Bench_wgt_30002]
recode Q12_8 (0=1) (1=2)

```

\*Community-level factors

gen Media=.

replace Media= 1 if Q5\_7\_1==0 & Q5\_7\_2==0 & Q5\_7\_3==0 & Q5\_7\_4==0 & Q5\_7\_5==0 & Q5\_7\_6==0 & Q5\_7\_7==0

replace Media= 2 if Q5\_7\_1==1 & Q5\_7\_2==1 & Q5\_7\_3==1 & Q5\_7\_4==1 & Q5\_7\_5==1 & Q5\_7\_6==1 & Q5\_7\_7==1

\*Q5\_1 Q5\_2\_2 Q5\_2\_6 Q5\_2\_7

recode Media (1=1 "No") (2=2 "Yes"), gen (Media\_Access)

\*Residential status

ta Q1\_Recode\_Dwelling [iw=Bench\_wgt\_30002]

replace Q1\_Recode\_Dwelling=. if Q1\_Recode\_Dwelling==3

ta Migration\_Status [iw=Bench\_wgt\_30002]

ta Media\_Access [iw=Bench\_wgt\_30002]

ta Migration\_Status [iw=Bench\_wgt\_30002]

ta Q12\_3 [iw=Bench\_wgt\_30002]

ta Grouped\_Age [iw=Bench\_wgt\_30002]

ta S8 [iw=Bench\_wgt\_30002]

ta Q12\_1\_Recode [iw=Bench\_wgt\_30002]

ta Highest\_Education [iw=Bench\_wgt\_30002]

ta Population\_group [iw=Bench\_wgt\_30002]

ta Income [iw=Bench\_wgt\_30002]

ta Q8\_15 [iw=Bench\_wgt\_30002]

\*\*Employment\_Status

\*ta q14\_4\_rel\_status [iw=weight]

\*ta Marrital\_Status [iw=weight]

ta Q11\_6 [iw=Bench\_wgt\_30002]

ta Q11\_1 [iw=Bench\_wgt\_30002]

\*Household-level factors

ta Q12\_6 [iw=Bench\_wgt\_30002]  
ta Q12\_5\_Recode [iw=Bench\_wgt\_30002]  
ta People\_in\_HH [iw=Bench\_wgt\_30002]  
ta Q12\_7\_Recode [iw=Bench\_wgt\_30002]  
\*ta q14\_7\_60plus\_recode [iw=Bench\_wgt\_30002]  
ta Q5\_9 [iw=Bench\_wgt\_30002]  
ta Q12\_8 [iw=Bench\_wgt\_30002]

\*Community-level factors

ta Q1\_Recode\_Dwelling [iw=Bench\_wgt\_30002]  
ta Migration\_Status [iw=Bench\_wgt\_30002]  
ta Media\_Access [iw=Bench\_wgt\_30002]

\*\*\*\*\*

\*Individual factors

ta Migration\_Status  
gen life\_sati\_5=Q7\_9 if Migration\_Status==1 | Migration\_Status==2  
\*gen lifesatisfaction=LifeSati if Migration\_Status==1 | Migration\_Status==2  
gen groupedage=Grouped\_Age if Migration\_Status==1 | Migration\_Status==2  
gen sex=S8 if Migration\_Status==1 | Migration\_Status==2  
gen highesteducation=Highest\_Education if Migration\_Status==1 | Migration\_Status==2  
gen populationgroup=Population\_group if Migration\_Status==1 | Migration\_Status==2  
gen income=Income if Migration\_Status==1 | Migration\_Status==2  
gen working=Q8\_15 if Migration\_Status==1 | Migration\_Status==2  
\*gen marritalstatus=Marrital\_Status if Migration\_Status==1 | Migration\_Status==2  
gen medicalaid=Q11\_6 if Migration\_Status==1 | Migration\_Status==2  
gen healthfacility=Q11\_1 if Migration\_Status==1 | Migration\_Status==2

\*Household-level factors

gen hhhead=Q12\_6 if Migration\_Status==1 | Migration\_Status==2  
recode hhhead (1/9=1 "HhH"), gen (HHead)

```

ta HHead
gen HHeadSex=.
replace HHeadSex=1 if HHead==1 & sex==1
replace HHeadSex=2 if HHead==1 & sex==2
gen hmembers=People_in_HH if Migration_Status==1 | Migration_Status==2
gen under18=Q12_7_Recode if Migration_Status==1 | Migration_Status==2
*gen sixtyplus=q14_7_60plus_recode if Migration_Status==1 | Migration_Status==2
gen childhunger=Q5_9 if Migration_Status==1 | Migration_Status==2
gen social_grant=Q12_8 if Migration_Status==1 | Migration_Status==2

*Community-level factors
gen dwellingtype=Q1_Recode_Dwelling if Migration_Status==1 | Migration_Status==2
*gen Migration_Status if Migration_Status==1 | Migration_Status==2
gen mediaaccess=Media_Access if Migration_Status==1 | Migration_Status==2

drop if Migration_Status==.
*drop if lifesatisfaction==.
drop if groupedage==.
drop if sex==.
drop if highesteducation==.
drop if populationgroup==.
drop if income==.
drop if working==.
*drop if marritalstatus==.
drop if medicalaid==.
drop if healthfacility==.
drop if dwellingtype==.

*Frequency
ta life_sati_5 Migration_Status [iw=Bench_wgt_30002]
ta Migration_Status [iw=Bench_wgt_30002]
*ta lifesatisfaction
ta groupedage Migration_Status [iw=Bench_wgt_30002]

```

ta sex Migration\_Status [iw=Bench\_wgt\_30002]  
ta highesteducation Migration\_Status [iw=Bench\_wgt\_30002]  
ta populationgroup Migration\_Status [iw=Bench\_wgt\_30002]  
ta income Migration\_Status [iw=Bench\_wgt\_30002]  
ta working Migration\_Status [iw=Bench\_wgt\_30002]  
\*ta marritalstatus Migration\_Status [iw=Bench\_wgt\_30002]  
ta medicalaid Migration\_Status [iw=Bench\_wgt\_30002]  
ta healthfacility Migration\_Status [iw=Bench\_wgt\_30002]

\*Household-level factors

ta HHeadSex Migration\_Status [iw=Bench\_wgt\_30002]  
ta hhmembers Migration\_Status [iw=Bench\_wgt\_30002]  
ta under18 Migration\_Status [iw=Bench\_wgt\_30002]  
\*ta sixtyplus Migration\_Status [iw=Bench\_wgt\_30002]  
ta childhunger Migration\_Status [iw=Bench\_wgt\_30002]  
ta social\_grant Migration\_Status [iw=Bench\_wgt\_30002]

\*Community-level factors

ta dwellingtype Migration\_Status [iw=Bench\_wgt\_30002]  
ta Migration\_Status Migration\_Status [iw=Bench\_wgt\_30002]  
ta mediaaccess Migration\_Status [iw=Bench\_wgt\_30002]

\*Frequency by sex

ta Migration\_Status [iw=Bench\_wgt\_30002]  
ta life\_sati\_5 [iw=Bench\_wgt\_30002]  
ta life\_sati\_5 Migration\_Status [iw=Bench\_wgt\_30002]  
ta life\_sati\_5 sex [iw=Bench\_wgt\_30002]  
ta groupedage sex [iw=Bench\_wgt\_30002]  
ta sex [iw=Bench\_wgt\_30002]  
ta highesteducation sex [iw=Bench\_wgt\_30002]  
ta populationgroup sex [iw=Bench\_wgt\_30002]  
ta income sex [iw=Bench\_wgt\_30002]

ta working sex [iw=Bench\_wgt\_30002]  
\*ta marritalstatus sex [iw=Bench\_wgt\_30002]  
ta medicalaid sex [iw=Bench\_wgt\_30002]  
ta healthfacility sex [iw=Bench\_wgt\_30002]

\*Household-level factors

ta HHeadSex [iw=Bench\_wgt\_30002]  
ta hhmembers sex [iw=Bench\_wgt\_30002]  
ta under18 sex [iw=Bench\_wgt\_30002]  
\*ta sixtyplus sex [iw=Bench\_wgt\_30002]  
ta childhunger sex [iw=Bench\_wgt\_30002]  
ta social\_grant sex [iw=Bench\_wgt\_30002]

\*Community-level factors

ta dwellingtype sex [iw=Bench\_wgt\_30002]  
ta Migration\_Status sex [iw=Bench\_wgt\_30002]  
ta mediaaccess sex [iw=Bench\_wgt\_30002]

\*\*\*\*\*

table sex life\_sati\_5 Migration\_Status [iw=Bench\_wgt\_30002]  
table life\_sati\_5 Migration\_Status [iw=Bench\_wgt\_30002]
