# Supplementary material for: Determinants of life satisfaction among migrants in South Africa: an analysis of the GCRO’s quality of life survey (2009–2021)
Source: Springer Nature journal article supplement (doi:10.1186/s12889-023-16868-1), 2023-10-18
Supplement: MOESM7 [file 26196138]

```

clear
use "C:\gcro-qols-v-v1.1\qols-v-2017-2018-v1.1.dta", clear
numlabel, add
*rename ID Unique_Identifier
*Weights
*Persons weight
* DOWNSCALE_MUN_PP_BENCHWGT
*Household weight
* HH_WEIGHT

*In-migrants and Immigrants
ta Q3_01_recode
replace Q3_01_recode=. if Q3_01_recode==1
recode Q3_01_recode (2=1 "In-migrants") (3=2 "Immigrants"), gen (Migration_Status)
ta Migration_Status [iw=weight]

*Outcome variable Life satisfaction
*ta F4lifsat
*ta F4lifsat,nol
*recode F4lifsat (0/4.999999999=0 "Suffering") (5/6.999999999=1 "Struggling") (7.002461/10=2
"Thriving"), gen (LifeSati)
*recode LifeSati (5=1)
*ta LifeSati

*Individual factors
ta Q15_02_age [iw=weight]
recode Q15_02_age (18/27=1 "18-27") (28/37=2 "28-37") (38/47=3 "38-47") (48/105=4 "48+"), gen
(Grouped_Age)
ta Grouped_Age [iw=weight]
ta A2_Sex [iw=weight]
ta Q15_01_education_recode [iw=weight]
replace Q15_01_education_recode=. if Q15_01_education_recode==6

```

```

recode Q15_01_education_recode (1=1 "No_Edu") (2=2 "Primary") (3/5=3 "Secondary_Higher"),
gen (Highest_Education)

ta Highest_Education [iw=weight]

ta A1_Pop_group [iw=weight]

replace A1_Pop_group=. if A1_Pop_group==5

recode A1_Pop_group (1=1 "Black_African") (2/4=2 "Non_Black_African"), gen (Population_group)

ta Population_group [iw=weight]

ta Q15_20_income [iw=weight]

replace Q15_20_income=. if Q15_20_income==18

recode Q15_20_income (17=1 "No_Income") (1/6=2 "Low") (7/8=3 "Middle") (9/16=4 "High"), gen
(Income)

ta Income [iw=weight]

recode Q11_12_working (0=1) (1=2)

ta Q11_12_working [iw=weight]

*Occupation

*ta q14_4_rel_status [iw=weight]

*replace q14_4_rel_status=. if q14_4_rel_status==7

*recode q14_4_rel_status (3=1 "Never_Married") (1=2 "Married_Cohab") (2=2) (6=2) (4=3
"Divorced") (5=4 "Widowed"), gen (Marrital_Status)

*ta Marrital_Status [iw=weight]

*Access to media

*Parity/number of children

*IPV

ta Q14_04_medaid [iw=weight]

replace Q14_04_medaid=. if Q14_04_medaid>=5

recode Q14_04_medaid (4=1) (2/3=2)

ta Q14_01_healthcare_services [iw=weight]

replace Q14_01_healthcare_services=. if Q14_01_healthcare_services>=4

*Household-level factors

*HH Wealth index

ta Q15_05_head [iw=weight]

ta Q1_01_02_people [iw=weight]

recode Q1_01_02_people (1=1 "One") (2=2 "Two") (3=3 "Three") (4/30=4 "Four_More"), gen
(People_in_HH)

```

\*(1/3=1 "1-3") (4/5=2 "4-5") (6/7=3 "6more"), gen (People\_in\_HH)

ta People\_in\_HH [iw=weight]

ta Q15\_09\_under18 [iw=weight]

recode Q15\_09\_under18 (0=1) (1=2) (2=3) (3=4) (4/12=5)

\*ta q14\_7\_60plus\_recode [iw=weight]

ta Q7\_05\_child [iw=weight]

recode Q7\_05\_child (2=1) (1=2) (3=3)

ta Q15\_12\_grant [iw=weight]

recode Q15\_12\_grant (0=1) (1=2)

\*Community-level factors

gen Media=.

replace Media= 1 if Q7\_03\_1==0 & Q7\_03\_2==0 & Q7\_03\_3==0 & Q7\_03\_4==0 & Q7\_03\_5==0 & Q7\_03\_6==0

replace Media= 2 if Q7\_03\_1==1 & Q7\_03\_2==1 & Q7\_03\_3==1 & Q7\_03\_4==1 & Q7\_03\_5==1 & Q7\_03\_6==1

recode Media (1=1 "No") (2=2 "Yes"), gen (Media\_Access)

\*Q6\_02\_2 Q6\_02\_6 Q6\_02\_7

\*Residential status

ta A3\_dwelling\_recode [iw=weight]

replace A3\_dwelling\_recode=. if A3\_dwelling\_recode==3

ta Migration\_Status [iw=weight]

ta Media\_Access [iw=weight]

ta Migration\_Status [iw=weight]

\*Individual factors

ta Grouped\_Age [iw=weight]

ta A2\_Sex [iw=weight]

ta Q15\_01\_education\_recode [iw=weight]

ta Highest\_Education [iw=weight]

ta Population\_group [iw=weight]  
ta Income [iw=weight]  
ta Q11\_12\_working [iw=weight]  
\*ta q14\_4\_rel\_status [iw=weight]  
\*ta Marrital\_Status [iw=weight]  
ta Q14\_04\_medaid [iw=weight]  
ta Q14\_01\_healthcare\_services [iw=weight]

\*Household-level factors

ta Q15\_05\_head [iw=weight]  
ta People\_in\_HH [iw=weight]  
ta Q15\_09\_under18 [iw=weight]  
\*ta q14\_7\_60plus\_recode [iw=weight]  
ta Q7\_05\_child [iw=weight]  
ta Q15\_12\_grant [iw=weight]

\*Community-level factors

ta A3\_dwelling\_recode [iw=weight]  
ta Migration\_Status [iw=weight]  
ta Media\_Access [iw=weight]

\*\*\*\*\*

\*Individual factors

ta Migration\_Status  
gen life\_sati\_5=Q10\_10\_life if Migration\_Status==1 | Migration\_Status==2  
\*gen lifesatisfaction=LifeSati if Migration\_Status==1 | Migration\_Status==2  
gen groupedage=Grouped\_Age if Migration\_Status==1 | Migration\_Status==2  
gen sex=A2\_Sex if Migration\_Status==1 | Migration\_Status==2  
gen highesteducation=Highest\_Education if Migration\_Status==1 | Migration\_Status==2

```
gen populationgroup=Population_group if Migration_Status==1 | Migration_Status==2
gen income=Income if Migration_Status==1 | Migration_Status==2
gen working=Q11_12_working if Migration_Status==1 | Migration_Status==2
*gen maritalstatus=Marrital_Status if Migration_Status==1 | Migration_Status==2
gen medicalaid=Q14_04_medaid if Migration_Status==1 | Migration_Status==2
gen healthfacility=Q14_01_healthcare_services if Migration_Status==1 | Migration_Status==2
```

\*Household-level factors

```
gen hhhead=Q15_05_head if Migration_Status==1 | Migration_Status==2
recode hhhead (1/9=1 "HhH"), gen (HHead)
ta HHead
gen HHeadSex=.
replace HHeadSex=1 if HHead==1 & sex==1
replace HHeadSex=2 if HHead==1 & sex==2
gen hhmembers=People_in_HH if Migration_Status==1 | Migration_Status==2
gen under18=Q15_09_under18 if Migration_Status==1 | Migration_Status==2
*gen sixtyplus=q14_7_60plus_recode if Migration_Status==1 | Migration_Status==2
gen childhunger=Q7_05_child if Migration_Status==1 | Migration_Status==2
gen social_grant=Q15_12_grant if Migration_Status==1 | Migration_Status==2
```

\*Community-level factors

```
gen dwellingtype=A3_dwelling_recode if Migration_Status==1 | Migration_Status==2
*gen Migration_Status if Migration_Status==1 | Migration_Status==2
gen mediaaccess=Media_Access if Migration_Status==1 | Migration_Status==2
```

```
drop if Migration_Status==.
```

```
*drop if lifesatisfaction==.
```

```
drop if groupedage==.
```

```
drop if sex==.
```

```
drop if highesteducation==.
```

```
drop if populationgroup==.
```

```
drop if income==.
```

```
drop if working==.
```

\*drop if marritalstatus==.

drop if medicalaid==.

drop if healthfacility==.

drop if dwellingtype==.

\*\*\*\*\*

\*Frequency by migration status

ta life\_sati\_5 Migration\_Status [iw=weight]

ta Migration\_Status [iw=weight]

\*ta lifesatisfaction Migration\_Status [iw=weight]

\*ta lifesatisfaction sex [iw=weight]

ta groupedage Migration\_Status [iw=weight]

ta sex Migration\_Status [iw=weight]

ta highesteducation Migration\_Status [iw=weight]

ta populationgroup Migration\_Status [iw=weight]

ta income Migration\_Status [iw=weight]

ta working Migration\_Status [iw=weight]

\*ta marritalstatus Migration\_Status [iw=weight]

ta medicalaid Migration\_Status [iw=weight]

ta healthfacility Migration\_Status [iw=weight]

\*Household-level factors

ta HHeadSex Migration\_Status [iw=weight]

ta hhmembers Migration\_Status [iw=weight]

ta under18 Migration\_Status [iw=weight]

\*ta sixtyplus Migration\_Status [iw=weight]

ta childhunger Migration\_Status [iw=weight]

ta social\_grant Migration\_Status [iw=weight]

\*Community-level factors

ta dwellingtype Migration\_Status [iw=weight]

ta Migration\_Status Migration\_Status [iw=weight]

ta mediaaccess Migration\_Status [iw=weight]

\*Frequency by sex

ta Migration\_Status [iw=weight]  
ta life\_sati\_5 [iw=weight]  
ta life\_sati\_5 Migration\_Status [iw=weight]  
ta life\_sati\_5 sex [iw=weight]  
ta groupedage sex [iw=weight]  
ta sex [iw=weight]  
ta highesteducation sex [iw=weight]  
ta populationgroup sex [iw=weight]  
ta income sex [iw=weight]  
ta working sex [iw=weight]  
\*ta marritalstatus sex [iw=weight]  
ta medicalaid sex [iw=weight]  
ta healthfacility sex [iw=weight]

\*Household-level factors

ta HHeadSex sex [iw=weight]  
ta hhmembers sex [iw=weight]  
ta under18 sex [iw=weight]  
\*ta sixtyplus sex [iw=weight]  
ta childhunger sex [iw=weight]  
ta social\_grant sex [iw=weight]

\*Community-level factors

ta dwellingtype sex [iw=weight]  
ta Migration\_Status sex [iw=weight]  
ta mediaaccess sex [iw=weight]

\*\*\*\*\*

table sex life\_sati\_5 Migration\_Status [iw=weight]  
table life\_sati\_5 Migration\_Status [iw=weight]
