# Supplementary material for: Determinants of life satisfaction among migrants in South Africa: an analysis of the GCRO’s quality of life survey (2009–2021)
Source: Springer Nature journal article supplement (doi:10.1186/s12889-023-16868-1), 2023-10-18
Supplement: MOESM8 [file 26196138]

clear

use "C:\qols-2020-2021-v1\qols-2020-2021-new-weights-v1.dta", clear

numlabel, add

\*Uniqu identifier

\*rename unique\_id Unique\_Identifier

\*Weights

\*Persons weight

\* DOWNSCALE\_MUN\_PP\_BENCHWGT

\*Household weight

\* HH\_WEIGHT

\*In-migrants and Immigrants

ta q3\_1\_birth\_prov\_recode

replace q3\_1\_birth\_prov\_recode=. if q3\_1\_birth\_prov\_recode==1

recode q3\_1\_birth\_prov\_recode (2=1 "In-migrants") (3=2 "Immigrants"), gen (Migration\_Status)

ta Migration\_Status [iw=DOWNSCALE\_MUN\_PP\_BENCHWGT]

\*Outcome variable Life satisfaction

ta q9\_9\_life

rename q9\_9\_life Life\_Satisfaction

ta Life\_Satisfaction

ta F4lifsat

ta F4lifsat,nol

recode F4lifsat (0/4.999999999=0 "Suffering") (5/6.999999999=1 "Struggling") (7.002461/10=2 "Thriving"), gen (LifeSati)

recode LifeSati (5=1)

ta LifeSati

\*Individual factors

ta q14\_2\_age\_topcode [iw=DOWNSCALE\_MUN\_PP\_BENCHWGT]

```

recode q14_2_age_topcode (18/27=1 "18-27") (28/37=2 "28-37") (38/47=3 "38-47") (48/80=4
"48+"), gen (Grouped_Age)
ta Grouped_Age [iw=DOWNSCALE_MUN_PP_BENCHWGT]
ta a2_sex [iw=DOWNSCALE_MUN_PP_BENCHWGT]
ta q14_1_education_recode [iw=DOWNSCALE_MUN_PP_BENCHWGT]
replace q14_1_education_recode=. if q14_1_education_recode==6
recode q14_1_education_recode (1=1 "No_Edu") (2=2 "Primary") (3/5=3 "Secondary_Higher"), gen
(Highest_Education)
ta Highest_Education [iw=DOWNSCALE_MUN_PP_BENCHWGT]
ta a1_pop_group [iw=DOWNSCALE_MUN_PP_BENCHWGT]
replace a1_pop_group=. if a1_pop_group==5
recode a1_pop_group (1=1 "Black_African") (2/4=2 "Non_Black_African"), gen (Population_group)
ta Population_group [iw=DOWNSCALE_MUN_PP_BENCHWGT]
ta q15_3_income [iw=DOWNSCALE_MUN_PP_BENCHWGT]
replace q15_3_income=. if q15_3_income>=18
recode q15_3_income (17=1 "no_inc") (1/6=2 "Low") (7/8=3 "Middle") (9/16=4 "High"), gen
(Income)
ta Income [iw=DOWNSCALE_MUN_PP_BENCHWGT]
ta q10_2_working [iw=DOWNSCALE_MUN_PP_BENCHWGT]
recode q10_2_working (0=1) (1=2)
*Occupation
ta q14_4_rel_status [iw=DOWNSCALE_MUN_PP_BENCHWGT]
replace q14_4_rel_status=. if q14_4_rel_status==7
recode q14_4_rel_status (3=1 "Never_Married") (1=2 "Married_Cohab") (2=2) (6=2) (4=3
"Divorced") (5=4 "Widowed"), gen (Marrital_Status)
ta Marrital_Status [iw=DOWNSCALE_MUN_PP_BENCHWGT]
*Access to media
*Parity/number of children
*IPV
ta q13_5_medical_aid [iw=DOWNSCALE_MUN_PP_BENCHWGT]
replace q13_5_medical_aid=. if q13_5_medical_aid==2
recode q13_5_medical_aid (0=1) (1=2)
ta q13_1_healthcare [iw=DOWNSCALE_MUN_PP_BENCHWGT]
replace q13_1_healthcare=. if q13_1_healthcare>=4

```

\*Household-level factors

\*HH Wealth index

\*ta q14\_8\_head [iw=DOWNSCALE\_MUN\_PP\_BENCHWGT]

ta q14\_5\_people\_recode [iw=DOWNSCALE\_MUN\_PP\_BENCHWGT]

recode q14\_5\_people\_recode (1=1 "One") (2=2 "Two") (3=3 "Three") (4/7=4 "Four\_More"), gen  
(People\_in\_HH)

ta People\_in\_HH [iw=DOWNSCALE\_MUN\_PP\_BENCHWGT]

ta q14\_6\_under18\_recode [iw=DOWNSCALE\_MUN\_PP\_BENCHWGT]

ta q14\_7\_60plus\_recode [iw=DOWNSCALE\_MUN\_PP\_BENCHWGT]

ta q6\_5\_feed\_children [iw=DOWNSCALE\_MUN\_PP\_BENCHWGT]

recode q6\_5\_feed\_children (0=1) (1=2) (2=3)

ta q14\_10\_social\_grant [iw=DOWNSCALE\_MUN\_PP\_BENCHWGT]

recode q14\_10\_social\_grant (0=1) (1=2)

\*Community-level factors

gen Media=.

replace Media= 1 if q6\_3\_1\_landline==0 & q6\_3\_2\_cell==0 & q6\_3\_3\_tv==0 &  
q6\_3\_4\_computer==0 & q6\_3\_5\_radio==0 & q6\_3\_6\_dstv==0 & q6\_3\_7\_internet==0

replace Media= 2 if q6\_3\_1\_landline==1 & q6\_3\_2\_cell==1 & q6\_3\_3\_tv==1 &  
q6\_3\_4\_computer==1 & q6\_3\_5\_radio==1 & q6\_3\_6\_dstv==1 & q6\_3\_7\_internet==1

recode Media (1=1 "No") (2=2 "Yes"), gen (Media\_Access)

ta Media\_Access [iw=DOWNSCALE\_MUN\_PP\_BENCHWGT]

\*q6\_1\_internet

\*Residential status

ta a3\_dwelling\_type\_recode [iw=DOWNSCALE\_MUN\_PP\_BENCHWGT]

replace a3\_dwelling\_type\_recode=. if a3\_dwelling\_type\_recode==3

\*Individual factors

ta Migration\_Status

gen life\_sati\_5=Life\_Satisfaction if Migration\_Status==1 | Migration\_Status==2

```
gen lifesatisfaction=LifeSati if Migration_Status==1 | Migration_Status==2
gen groupedage=Grouped_Age if Migration_Status==1 | Migration_Status==2
gen sex=a2_sex if Migration_Status==1 | Migration_Status==2
gen highesteducation=Highest_Education if Migration_Status==1 | Migration_Status==2
gen populationgroup=Population_group if Migration_Status==1 | Migration_Status==2
gen income=Income if Migration_Status==1 | Migration_Status==2
gen working=q10_2_working if Migration_Status==1 | Migration_Status==2
gen marritalstatus=Marrital_Status if Migration_Status==1 | Migration_Status==2
gen medicalaid=q13_5_medical_aid if Migration_Status==1 | Migration_Status==2
gen healthfacility=q13_1_healthcare if Migration_Status==1 | Migration_Status==2
```

\*Household-level factors

```
gen hhhead=q14_8_head if Migration_Status==1 | Migration_Status==2
recode hhhead (1/9=1 "HhH"), gen (HHead)
ta HHead
gen HHeadSex=.
replace HHeadSex=1 if HHead==1 & sex==1
replace HHeadSex=2 if HHead==1 & sex==2
ta HHeadSex [iw=DOWNSCALE_MUN_PP_BENCHWGT]
gen hhmembers=People_in_HH if Migration_Status==1 | Migration_Status==2
gen under18=q14_6_under18_recode if Migration_Status==1 | Migration_Status==2
gen sixtyplus=q14_7_60plus_recode if Migration_Status==1 | Migration_Status==2
gen childhunger=q6_5_feed_children if Migration_Status==1 | Migration_Status==2
gen social_grant=q14_10_social_grant if Migration_Status==1 | Migration_Status==2
```

\*Community-level factors

```
gen dwellingtype=a3_dwelling_type_recode if Migration_Status==1 | Migration_Status==2
*gen Migration_Status if Migration_Status==1 | Migration_Status==2
gen mediaaccess=Media_Access if Migration_Status==1 | Migration_Status==2
```

```
drop if Migration_Status==.
```

```
drop if lifesatisfaction==.
```

```
drop if groupedage==.
```

drop if sex==.  
drop if highesteducation==.  
drop if populationgroup==.  
drop if income==.  
drop if working==.  
drop if maritalstatus==.  
drop if medicalaid==.  
drop if healthfacility==.  
drop if dwellingtype==.

\*Frequency by migration status

ta life\_sati\_5 Migration\_Status [iw=DOWNSCALE\_MUN\_PP\_BENCHWGT]  
ta Migration\_Status [iw=DOWNSCALE\_MUN\_PP\_BENCHWGT]  
ta lifesatisfaction Migration\_Status [iw=DOWNSCALE\_MUN\_PP\_BENCHWGT]  
ta lifesatisfaction sex [iw=DOWNSCALE\_MUN\_PP\_BENCHWGT]  
ta groupedage Migration\_Status [iw=DOWNSCALE\_MUN\_PP\_BENCHWGT]  
ta sex Migration\_Status [iw=DOWNSCALE\_MUN\_PP\_BENCHWGT]  
ta highesteducation Migration\_Status [iw=DOWNSCALE\_MUN\_PP\_BENCHWGT]  
ta populationgroup Migration\_Status [iw=DOWNSCALE\_MUN\_PP\_BENCHWGT]  
ta income Migration\_Status [iw=DOWNSCALE\_MUN\_PP\_BENCHWGT]  
ta working Migration\_Status [iw=DOWNSCALE\_MUN\_PP\_BENCHWGT]  
ta maritalstatus Migration\_Status [iw=DOWNSCALE\_MUN\_PP\_BENCHWGT]  
ta medicalaid Migration\_Status [iw=DOWNSCALE\_MUN\_PP\_BENCHWGT]  
ta healthfacility Migration\_Status [iw=DOWNSCALE\_MUN\_PP\_BENCHWGT]

\*Household-level factors

ta HHeadSex Migration\_Status [iw=DOWNSCALE\_MUN\_PP\_BENCHWGT]  
ta hhmembers Migration\_Status [iw=DOWNSCALE\_MUN\_PP\_BENCHWGT]  
ta under18 Migration\_Status [iw=DOWNSCALE\_MUN\_PP\_BENCHWGT]  
ta sixtyplus Migration\_Status [iw=DOWNSCALE\_MUN\_PP\_BENCHWGT]  
ta childhunger Migration\_Status [iw=DOWNSCALE\_MUN\_PP\_BENCHWGT]  
ta social\_grant Migration\_Status [iw=DOWNSCALE\_MUN\_PP\_BENCHWGT]

\*Community-level factors

ta dwellingtype Migration\_Status [iw=DOWNSCALE\_MUN\_PP\_BENCHWGT]  
ta Migration\_Status Migration\_Status [iw=DOWNSCALE\_MUN\_PP\_BENCHWGT]  
ta mediaaccess Migration\_Status [iw=DOWNSCALE\_MUN\_PP\_BENCHWGT]

\*Frequency by sex

ta Migration\_Status [iw=DOWNSCALE\_MUN\_PP\_BENCHWGT]  
ta life\_sati\_5 Migration\_Status [iw=DOWNSCALE\_MUN\_PP\_BENCHWGT]  
ta lifesatisfaction [iw=DOWNSCALE\_MUN\_PP\_BENCHWGT]  
ta lifesatisfaction Migration\_Status [iw=DOWNSCALE\_MUN\_PP\_BENCHWGT]  
ta lifesatisfaction sex [iw=DOWNSCALE\_MUN\_PP\_BENCHWGT]  
ta groupedage sex [iw=DOWNSCALE\_MUN\_PP\_BENCHWGT]  
ta sex Migration\_Status [iw=DOWNSCALE\_MUN\_PP\_BENCHWGT]  
ta highesteducation sex [iw=DOWNSCALE\_MUN\_PP\_BENCHWGT]  
ta populationgroup sex [iw=DOWNSCALE\_MUN\_PP\_BENCHWGT]  
ta income sex [iw=DOWNSCALE\_MUN\_PP\_BENCHWGT]  
ta working sex [iw=DOWNSCALE\_MUN\_PP\_BENCHWGT]  
ta maritalstatus sex [iw=DOWNSCALE\_MUN\_PP\_BENCHWGT]  
ta medicalaid sex [iw=DOWNSCALE\_MUN\_PP\_BENCHWGT]  
ta healthfacility sex [iw=DOWNSCALE\_MUN\_PP\_BENCHWGT]

\*Household-level factors

ta HHeadSex [iw=DOWNSCALE\_MUN\_PP\_BENCHWGT]  
ta hhmembers sex [iw=DOWNSCALE\_MUN\_PP\_BENCHWGT]  
ta under18 sex [iw=DOWNSCALE\_MUN\_PP\_BENCHWGT]  
ta sixtyplus sex [iw=DOWNSCALE\_MUN\_PP\_BENCHWGT]  
ta childhunger sex [iw=DOWNSCALE\_MUN\_PP\_BENCHWGT]  
ta social\_grant sex [iw=DOWNSCALE\_MUN\_PP\_BENCHWGT]

\*Community-level factors

ta dwellingtype sex [iw=DOWNSCALE\_MUN\_PP\_BENCHWGT]  
ta Migration\_Status sex [iw=DOWNSCALE\_MUN\_PP\_BENCHWGT]  
ta mediaaccess sex [iw=DOWNSCALE\_MUN\_PP\_BENCHWGT]

\*\*\*\*\*

table sex life\_sati\_5 Migration\_Status [iw=DOWNSCALE\_MUN\_PP\_BENCHWGT]

table life\_sati\_5 Migration\_Status [iw=DOWNSCALE\_MUN\_PP\_BENCHWGT]
