# Supplementary material for: Determinants of life satisfaction among migrants in South Africa: an analysis of the GCRO’s quality of life survey (2009–2021)
Source: Springer Nature journal article supplement (doi:10.1186/s12889-023-16868-1), 2023-10-18
Supplement: MOESM9 [file 26196138]

\*Life satisfaction

clear

use "C:Merged data\2019 2020.dta", clear

merge m:m Unique\_Identifier ward WWeight Migration\_Status life\_sati\_5 life\_sati\_5 groupedage sex highesteducation populationgroup income working medicalaid healthfacility HHeadSex hhmembers under18 childhunger social\_grant dwellingtype mediaaccess using "C:\Users\Professor Likoko S\Desktop\Short data\2017 2018.dta"

drop \_merge

merge m:m Unique\_Identifier ward WWeight Migration\_Status life\_sati\_5 life\_sati\_5 groupedage sex highesteducation populationgroup income working medicalaid healthfacility HHeadSex hhmembers under18 childhunger social\_grant dwellingtype mediaaccess using "C:\Users\Professor Likoko S\Desktop\Short data\2015 2016.dta"

drop \_merge

merge m:m Unique\_Identifier ward WWeight Migration\_Status life\_sati\_5 life\_sati\_5 groupedage sex highesteducation populationgroup income working medicalaid healthfacility HHeadSex hhmembers under18 childhunger social\_grant dwellingtype mediaaccess using "C:\Users\Professor Likoko S\Desktop\Short data\2013 2014.dta"

drop \_merge

merge m:m Unique\_Identifier ward WWeight Migration\_Status life\_sati\_5 life\_sati\_5 groupedage sex highesteducation populationgroup income working medicalaid healthfacility HHeadSex hhmembers under18 childhunger social\_grant dwellingtype mediaaccess using "C:\Users\Professor Likoko S\Desktop\Short data\2011.dta"

drop \_merge

merge m:m Unique\_Identifier ward WWeight Migration\_Status life\_sati\_5 life\_sati\_5 groupedage sex highesteducation populationgroup income working medicalaid healthfacility HHeadSex hhmembers under18 childhunger social\_grant dwellingtype mediaaccess using "C:\Users\Professor Likoko S\Desktop\Short data\2009.dta"

drop if Migration\_Status==.

drop if life\_sati\_5==.

drop if groupedage==.

drop if sex==.

drop if highesteducation==.

drop if populationgroup==.

drop if income==.

drop if working==.

drop if medicalaid==.  
drop if healthfacility==.  
drop if dwellingtype==.  
drop if HHeadSex==.  
drop if hhmembers==.  
drop if under18==.  
drop if childhunger==.  
drop if social\_grant==.

\*\*\*\*\*

\*Frequency by migration status

ta life\_sati\_5 [iw=WWeight]

ta life\_sati\_5 Migration\_Status [iw=WWeight]

ta life\_sati\_5 sex if Migration\_Status==1 | Migration\_Status==2 [iw=WWeight]

ta Migration\_Status [iw=WWeight]

\*ta lifesatisfaction Migration\_Status [iw=WWeight]

\*ta lifesatisfaction sex [iw=WWeight]

ta groupedage Migration\_Status [iw=WWeight]

ta sex Migration\_Status [iw=WWeight]

ta highesteducation Migration\_Status [iw=WWeight]

ta populationgroup Migration\_Status [iw=WWeight]

ta income Migration\_Status [iw=WWeight]

ta working Migration\_Status [iw=WWeight]

\*ta marritalstatus Migration\_Status [iw=WWeight]

ta medicalaid Migration\_Status [iw=WWeight]

ta healthfacility Migration\_Status [iw=WWeight]

\*Household-level factors

ta HHeadSex Migration\_Status [iw=WWeight]

ta hhmembers Migration\_Status [iw=WWeight]

ta under18 Migration\_Status [iw=WWeight]

\*ta sixtyplus Migration\_Status [iw=WWeight]  
ta childhunger Migration\_Status [iw=WWeight]  
ta social\_grant Migration\_Status [iw=WWeight]

\*Community-level factors

ta dwellingtype Migration\_Status [iw=WWeight]  
ta Migration\_Status Migration\_Status [iw=WWeight]  
\*ta mediaaccess Migration\_Status [iw=WWeight]

\*Frequency by sex

ta Migration\_Status [iw=WWeight]  
ta life\_sati\_5 [iw=WWeight]  
ta life\_sati\_5 Migration\_Status [iw=WWeight]  
ta life\_sati\_5 sex [iw=WWeight]  
ta groupedage sex [iw=WWeight]  
ta sex [iw=WWeight]  
ta highesteducation sex [iw=WWeight]  
ta populationgroup sex [iw=WWeight]  
ta income sex [iw=WWeight]  
ta working sex [iw=WWeight]  
\*ta marritalstatus sex [iw=WWeight]  
ta medicalaid sex [iw=WWeight]  
ta healthfacility sex [iw=WWeight]

\*Household-level factors

\*ta HHeadSex sex [iw=WWeight]  
ta hhmembers sex [iw=WWeight]  
ta under18 sex [iw=WWeight]  
\*ta sixtyplus sex [iw=WWeight]  
ta childhunger sex [iw=WWeight]  
ta social\_grant sex [iw=WWeight]

\*Community-level factors

```
ta dwellingtype sex [iw=WWeight]
ta Migration_Status sex [iw=WWeight]
ta mediaaccess sex [iw=WWeight]
```

```
*****
```

```
table sex life_sati_5 Migration_Status [iw=WWeight]
table life_sati_5 Migration_Status [iw=WWeight]
```

```
*In-migrants
```

```
*Migration_Status Migration_Status
```

```
gen llife_sati_5 = life_sati_5 if Migration_Status==1
gen lsex = sex if Migration_Status==1
gen lgroupedage = groupedage if Migration_Status==1
gen lhighesteducation = highesteducation if Migration_Status==1
gen lpopulationgroup = populationgroup if Migration_Status==1
gen lincome = income if Migration_Status==1
gen lworking = working if Migration_Status==1
gen lmedicalaid = medicalaid if Migration_Status==1
gen lhealthfacility = healthfacility if Migration_Status==1
gen lHHeadSex = HHeadSex if Migration_Status==1
gen lhmembers = hmembers if Migration_Status==1
gen lunder18 = under18 if Migration_Status==1
gen lchildhunger = childhunger if Migration_Status==1
gen lsocial_grant = social_grant if Migration_Status==1
gen ldwellingtype = dwellingtype if Migration_Status==1
gen lmediaaccess = mediaaccess if Migration_Status==1
```

```
*Immigrants
```

```
gen lmlife_sati_5 = life_sati_5 if Migration_Status==2
gen lmmsex = sex if Migration_Status==2
gen lmmgroupedage = groupedage if Migration_Status==2
gen lmmhighesteducation = highesteducation if Migration_Status==2
gen lmmpopulationgroup = populationgroup if Migration_Status==2
```

```
gen Imincome = income if Migration_Status==2
gen Imworking = working if Migration_Status==2
gen Immedicalaid = medicalaid if Migration_Status==2
gen Imhealthfacility = healthfacility if Migration_Status==2
gen ImHHeadSex = HHeadSex if Migration_Status==2
gen Imhmembers = hmembers if Migration_Status==2
gen Imunder18 = under18 if Migration_Status==2
gen Imchildhunger = childhunger if Migration_Status==2
gen Imsocial_grant = social_grant if Migration_Status==2
gen Imdwellingtype = dwellingtype if Migration_Status==2
gen Immediaaccess = mediaaccess if Migration_Status==2
```

\*Pearson's Product Moment Correlation Coefficient

```
*pwcrr VariableA VariableB, sig star(.05) obs
```

\*In-migrants

```
pwcrr Isex Ilife_sati_5, sig star(.05) obs
pwcrr Igroupedage Ilife_sati_5, sig star(.05) obs
pwcrr Ihighesteducation Ilife_sati_5, sig star(.05) obs
pwcrr Ipopulationgroup Ilife_sati_5, sig star(.05) obs
pwcrr Iincome Ilife_sati_5, sig star(.05) obs
pwcrr Iworking Ilife_sati_5, sig star(.05) obs
pwcrr Imedicalaid Ilife_sati_5, sig star(.05) obs
pwcrr Ihealthfacility Ilife_sati_5, sig star(.05) obs
pwcrr IHHeadSex Ilife_sati_5, sig star(.05) obs
pwcrr Ihmembers Ilife_sati_5, sig star(.05) obs
pwcrr Iunder18 Ilife_sati_5, sig star(.05) obs
pwcrr Ichildhunger Ilife_sati_5, sig star(.05) obs
pwcrr Isocial_grant Ilife_sati_5, sig star(.05) obs
pwcrr Idwellingtype Ilife_sati_5, sig star(.05) obs
pwcrr Imediaaccess Ilife_sati_5, sig star(.05) obs
```

\*Immigrants

```
pwcrr Imsex Imlife_sati_5, sig star(.05) obs
```

pwcorr Imgroupedage Imlife\_sati\_5, sig star(.05) obs  
pwcorr Imhighesteducation Imlife\_sati\_5, sig star(.05) obs  
pwcorr Impopulationgroup Imlife\_sati\_5, sig star(.05) obs  
pwcorr Imincome Imlife\_sati\_5, sig star(.05) obs  
pwcorr Imworking Imlife\_sati\_5, sig star(.05) obs  
pwcorr Immedicalaid Imlife\_sati\_5, sig star(.05) obs  
pwcorr Imhealthfacility Imlife\_sati\_5, sig star(.05) obs  
pwcorr ImHHHeadSex Imlife\_sati\_5, sig star(.05) obs  
pwcorr Imhhmembers Imlife\_sati\_5, sig star(.05) obs  
pwcorr Imunder18 Imlife\_sati\_5, sig star(.05) obs  
pwcorr Imchildhunger Imlife\_sati\_5, sig star(.05) obs  
pwcorr Imsocial\_grant Imlife\_sati\_5, sig star(.05) obs  
pwcorr Imdwellingtype Imlife\_sati\_5, sig star(.05) obs  
pwcorr Immediaaccess Imlife\_sati\_5, sig star(.05) obs

\*In-migrants

\*Life\_sat sex

gen MIlife\_sati\_5 = life\_sati\_5 if sex==1  
gen MIsex = sex if sex==1  
gen MIgroupedage = groupedage if sex==1  
gen MIhighesteducation = highesteducation if sex==1  
gen MIpopulationgroup = populationgroup if sex==1  
gen MIincome = income if sex==1  
gen MIworking = working if sex==1  
gen MImedicalaid = medicalaid if sex==1  
gen MIhealthfacility = healthfacility if sex==1  
gen MIHHHeadSex = HHHeadSex if sex==1  
gen MIhhmembers = hhmembers if sex==1  
gen MIunder18 = under18 if sex==1  
gen MIchildhunger = childhunger if sex==1  
gen MISocial\_grant = social\_grant if sex==1  
gen MIDwellingtype = dwellingtype if sex==1  
gen MImediaaccess = mediaaccess if sex==1

gen MIMigration\_Status = Migration\_Status if sex==1

\*Immigrants

\*Life\_sat sex

gen Fllife\_sati\_5 = life\_sati\_5 if sex==2

gen FIsex = sex if sex==2

gen FIgroupedage = groupedage if sex==2

gen FIhighesteducation = highesteducation if sex==2

gen FIpopulationgroup = populationgroup if sex==2

gen FIincome = income if sex==2

gen FIworking = working if sex==2

gen FImedicalaid = medicalaid if sex==2

gen FIhealthfacility = healthfacility if sex==2

gen FIHHHeadSex = HHHeadSex if sex==2

gen FIhmembers = hmembers if sex==2

gen FIunder18 = under18 if sex==2

gen FIchildhunger = childhunger if sex==2

gen FISocial\_grant = social\_grant if sex==2

gen FIdwellingtype = dwellingtype if sex==2

gen FImediaaccess = mediaaccess if sex==2

gen FIMigration\_Status = Migration\_Status if sex==2

oprobit Mllife\_sati\_5 i.MIgroupedage i.MIhighesteducation i.MIpopulationgroup i.MIincome  
i.MIworking i.MImedicalaid i.MIhealthfacility i.MIhmembers i.MIunder18 i.MIchildhunger  
i.MISocial\_grant i.MI dwellingtype i.MIMigration\_Status, nolog

oprobit Fllife\_sati\_5 i.FIgroupedage i.FIhighesteducation i.FIpopulationgroup i.FIincome i.FIworking  
i.FImedicalaid i.FIhealthfacility i.FIhmembers i.FIunder18 i.FIchildhunger i.FISocial\_grant  
i.FI dwellingtype i.FIMigration\_Status, nolog

oprobit life\_sati\_5 i.sex i.groupedage i.highesteducation i.populationgroup i.income i.working  
i.medicalaid i.healthfacility i.hmembers i.under18 i.childhunger i.social\_grant i.dwellingtype  
i.Migration\_Status, nolog

ologit life\_sati\_5 i.sex i.groupedage i.highesteducation i.populationgroup i.income i.working  
i.medicalaid i.healthfacility i.hmembers i.under18 i.childhunger i.social\_grant i.dwellingtype  
i.Migration\_Status, nolog

margins MIgroupedage MIhighesteducation Mipopulationgroup MIincome MIworking MImedicalaid  
MIhealthfacility MIhhmembers MIunder18 MIchildhunger MISocial\_grant MIDwellingtype  
MIMigration\_Status

margins FIgroupedage FIhighesteducation Fipopulationgroup FIncome FIworking FImedicalaid  
FIhealthfacility FIhhmembers FIunder18 FIchildhunger FISocial\_grant FIdwellingtype  
FIMigration\_Status
